# Supplementary material for: Markers of fungal translocation are elevated during post-acute sequelae of SARS-CoV-2 and induce NF-κB signaling
Source: PubMed Central journal article supplement (PMC9462470; doi:10.1172/jci.insight.160989), 2022-08-08
Supplement: jciinsight-7-160989-s125.pdf [file jciinsight-7-160989-s125.pdf]

## Supplementary Figure 1

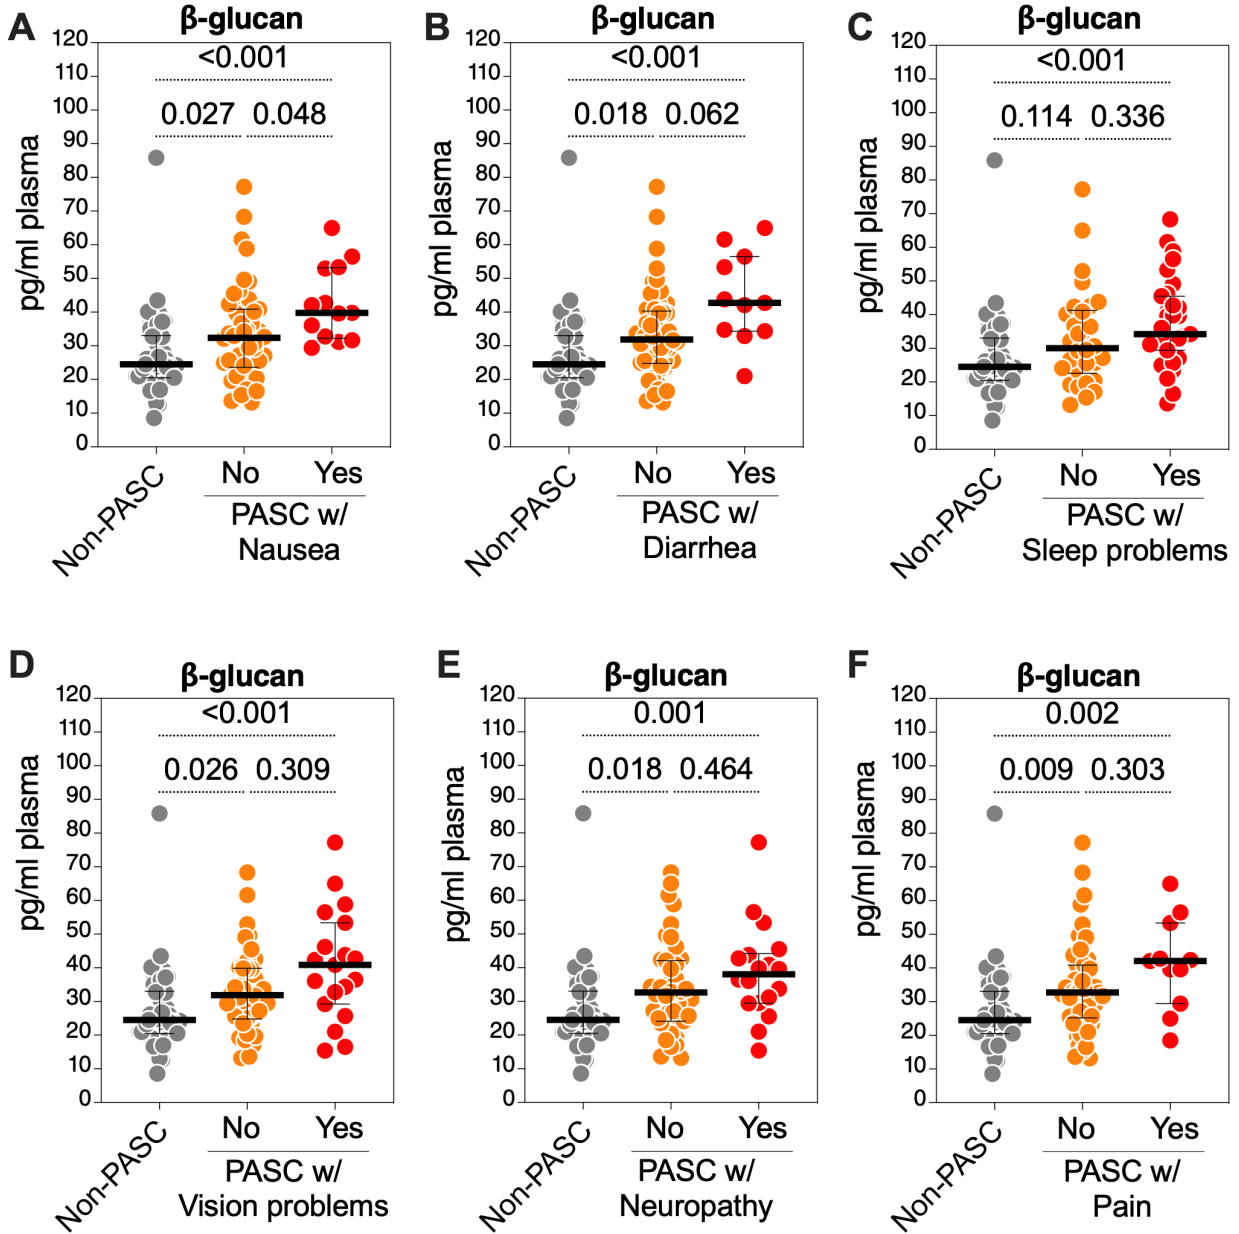

**Supplementary Figure 1.  $\beta$ -glucan levels in plasma correlate with certain PASC symptoms.** Kruskal-Wallis tests comparing  $\beta$ -glucan levels in non-PASC and PASC groups (from the UCSF LIINC cohort) with or without (A) nausea, (B) diarrhea, (C) vision problems, (D) sleep problems, (E) neuropathy, or (F) pain. Median and IQR are displayed.

## Supplementary Figure 2

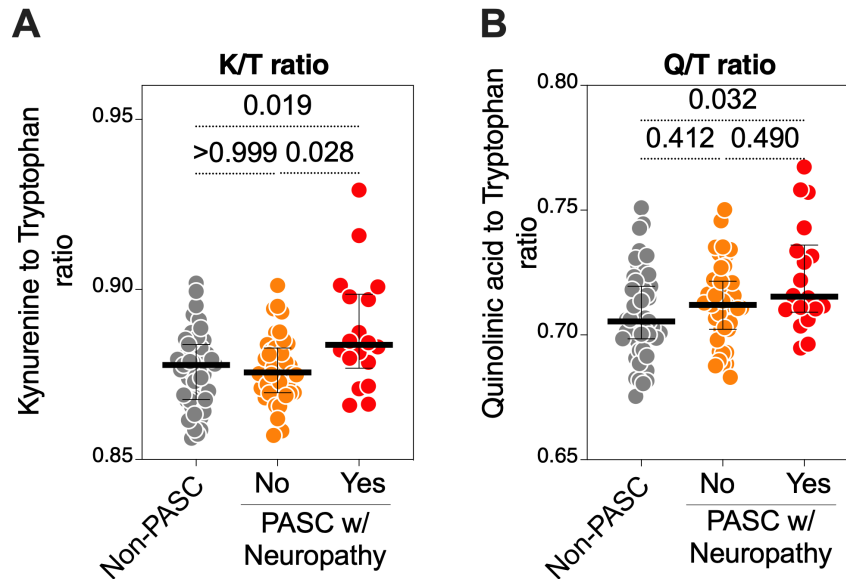

**Supplementary Figure 2. K/T and Q/T ratios correlate with neuropathy during PASC.** Kruskal-Wallis tests comparing **(A)** K/T ratio and **(B)** Q/T ratio between non-PASC and PASC groups (from the UCSF LIINC cohort) with or without neuropathy symptoms. Median and IQR are displayed.

### Supplementary Figure 3

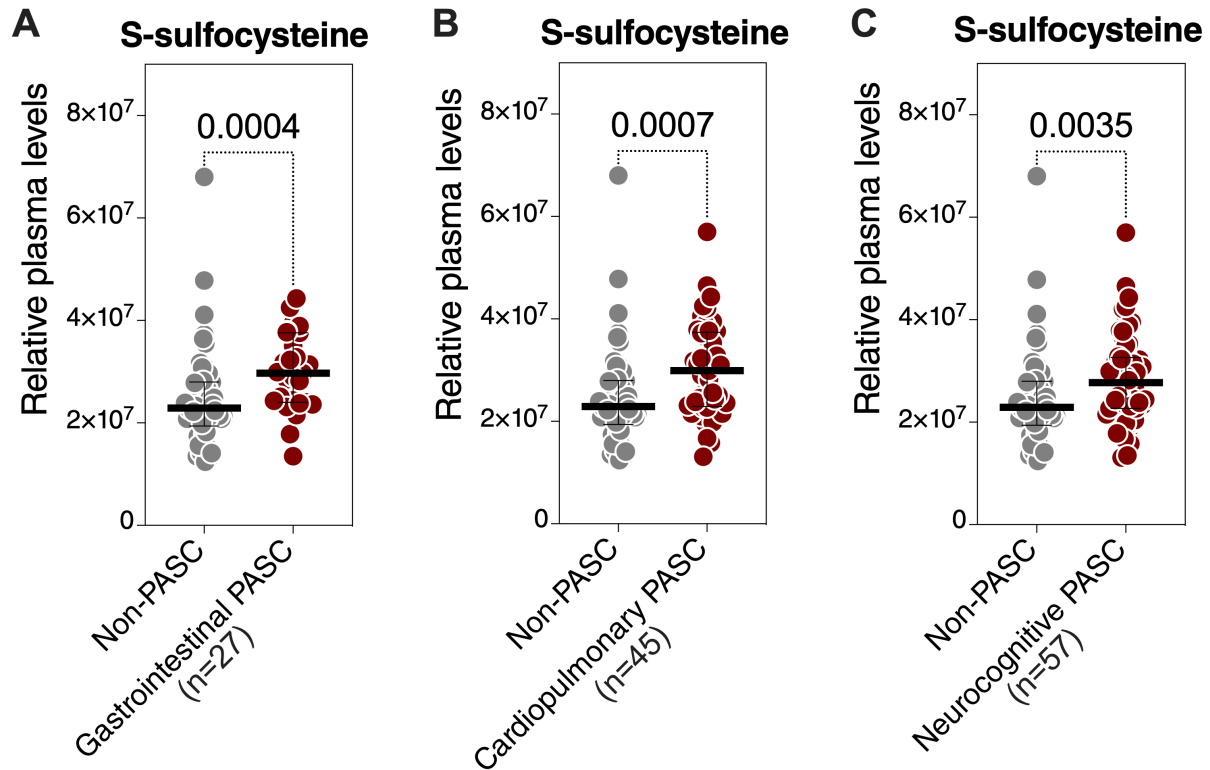

**Supplementary Figure 3. Levels of plasma S-sulfocysteine are higher in individuals experiencing three PASC phenotypes, based on clinical symptom clusters, compared to those without PASC.** PASC was divided to three phenotypes based on clinical symptom clusters defined as having at least one symptom in the cluster – gastrointestinal (nausea, diarrhea, loss of appetite, abdominal pain, vomiting), cardiopulmonary (cough, dyspnea, chest pain, palpitations), and neurocognitive (headache, concentration problems, dizziness, balance problems, neuropathy, vision problems). S-sulfocysteine levels were higher in individuals experiencing each of the three PASC symptom clusters compared to individuals who are not experiencing PASC. Mann–Whitney U tests. Median and IQR are displayed.

**Supplementary Figure 4**

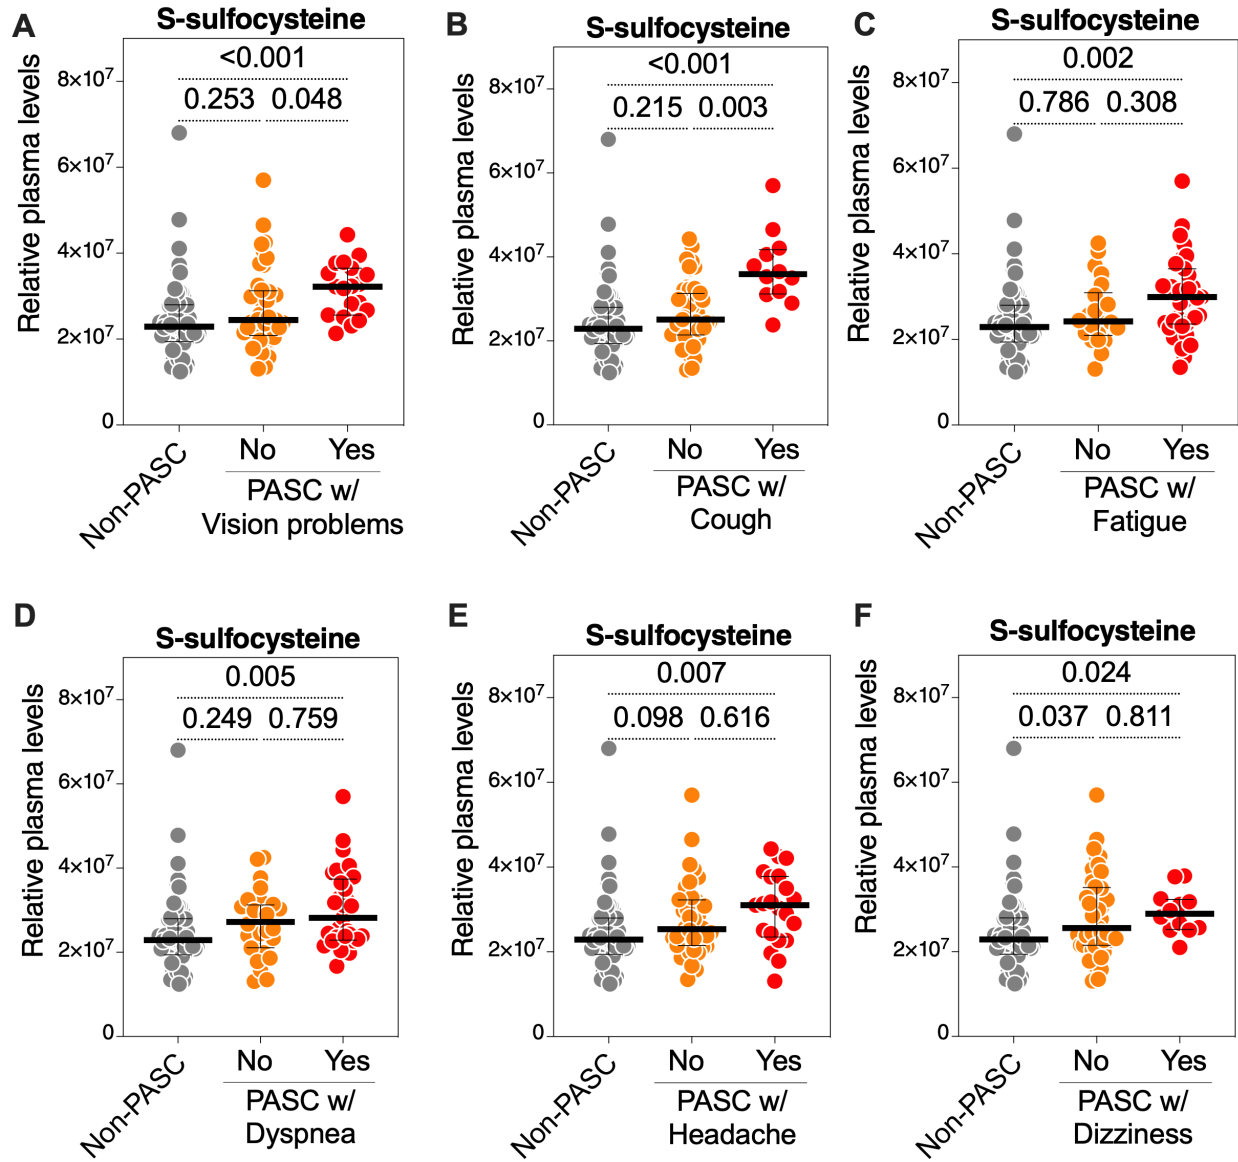

**Supplementary Figure 4. S-sulfocysteine levels in plasma correlate with certain PASC symptoms.** Kruskal-Wallis tests comparing S-sulfocysteine levels in non-PASC and PASC groups (from the UCSF LIINC cohort) with or without (A) vision problems, (B) fatigue, (C) headache, (D) dizziness, (E) cough, or (F) dyspnea. Median and IQR are displayed.

**Supplementary Table 1.** Plasma metabolites differ between PASC and non-PASC participants in the LIINC cohort.

| Marker                      |                           | PASC | n  | mean* | SD   | SEM  | min   | 25%   | median | 75%   | max   | Wilcoxon rank-sum P value |
|-----------------------------|---------------------------|------|----|-------|------|------|-------|-------|--------|-------|-------|---------------------------|
| Higher in PASC than no-PASC | S-sulfocysteine           | No   | 55 | 24.48 | 0.47 | 0.06 | 23.56 | 24.21 | 24.45  | 24.74 | 26.02 | 0.0025                    |
|                             |                           | Yes  | 61 | 24.71 | 0.44 | 0.06 | 23.64 | 24.44 | 24.72  | 24.97 | 25.76 |                           |
|                             | L-Cystine                 | No   | 55 | 27.35 | 0.52 | 0.07 | 25.93 | 26.99 | 27.35  | 27.69 | 28.58 | 0.0046                    |
|                             |                           | Yes  | 61 | 27.63 | 0.51 | 0.06 | 26.34 | 27.31 | 27.66  | 28.01 | 28.49 |                           |
|                             | L-Glutamine               | No   | 55 | 32.88 | 0.19 | 0.03 | 32.35 | 32.77 | 32.87  | 33.01 | 33.36 | 0.0333                    |
|                             |                           | Yes  | 61 | 32.97 | 0.24 | 0.03 | 32.45 | 32.85 | 32.95  | 33.15 | 33.49 |                           |
|                             | Quinolinic acid           | No   | 55 | 21.78 | 0.52 | 0.07 | 20.73 | 21.42 | 21.71  | 22.14 | 23.41 | 0.0352                    |
|                             |                           | Yes  | 61 | 21.98 | 0.50 | 0.06 | 21.01 | 21.61 | 21.90  | 22.28 | 23.39 |                           |
|                             | Ornithine                 | No   | 55 | 29.78 | 0.26 | 0.03 | 29.32 | 29.56 | 29.81  | 29.99 | 30.37 | 0.0387                    |
|                             |                           | Yes  | 61 | 29.89 | 0.27 | 0.03 | 29.26 | 29.73 | 29.86  | 30.08 | 30.38 |                           |
|                             | 2-Phenylphenol            | No   | 55 | 20.29 | 1.56 | 0.21 | 18.66 | 19.43 | 20.27  | 20.65 | 30.47 | 0.0392                    |
|                             |                           | Yes  | 61 | 20.76 | 2.27 | 0.29 | 18.49 | 19.74 | 20.64  | 20.83 | 30.96 |                           |
| Lower in PASC than no-PASC  | Sarcosine                 | No   | 55 | 26.48 | 0.27 | 0.04 | 25.67 | 26.30 | 26.47  | 26.67 | 27.09 | 0.0058                    |
|                             |                           | Yes  | 61 | 26.36 | 0.26 | 0.03 | 25.71 | 26.18 | 26.34  | 26.54 | 27.26 |                           |
|                             | 1-Methylnicotinamide      | No   | 55 | 24.02 | 1.08 | 0.15 | 21.35 | 23.40 | 23.91  | 24.72 | 27.46 | 0.0174                    |
|                             |                           | Yes  | 61 | 23.66 | 0.94 | 0.12 | 22.04 | 23.13 | 23.59  | 24.10 | 27.95 |                           |
|                             | 3,5-Dihydroxybenzoic acid | No   | 55 | 23.19 | 1.24 | 0.17 | 19.93 | 22.25 | 23.16  | 24.19 | 25.88 | 0.0376                    |
|                             |                           | Yes  | 61 | 22.72 | 1.23 | 0.16 | 20.09 | 21.66 | 22.79  | 23.45 | 25.59 |                           |
|                             | Indole-3-lactic acid      | No   | 55 | 25.32 | 0.48 | 0.06 | 24.25 | 25.03 | 25.28  | 25.55 | 26.89 | 0.0436                    |
|                             |                           | Yes  | 61 | 25.11 | 0.51 | 0.07 | 23.07 | 24.75 | 25.16  | 25.40 | 26.10 |                           |
|                             | L-Methionine              | No   | 55 | 30.18 | 0.31 | 0.04 | 28.94 | 29.98 | 30.22  | 30.38 | 30.76 | 0.0408                    |
|                             |                           | Yes  | 61 | 30.07 | 0.33 | 0.04 | 29.06 | 29.90 | 30.09  | 30.26 | 30.93 |                           |
|                             | Pipicolinic acid          | No   | 55 | 27.66 | 0.99 | 0.13 | 26.17 | 26.98 | 27.45  | 28.27 | 30.91 | 0.0430                    |
|                             |                           | Yes  | 61 | 27.38 | 1.16 | 0.15 | 25.43 | 26.64 | 27.07  | 27.93 | 31.43 |                           |

\* Log<sub>2</sub>transformed data

SD = Standard deviation

SEM= Standard Error of the Mean

Supplementary Table 2. Correlations between metabolites and clinical and inflammatory markers in the LIINC cohort.

| Markers                     | Parameter                 | Spearman correlations among all patients |           |         |         |         |              |              |         |         |              |         | Spearman correlations among no-PASC patients |           |         |         |         |              |              |         |         |              |         | Spearman correlations among PASC patients |           |         |         |         |              |              |         |         |              |       |
|-----------------------------|---------------------------|------------------------------------------|-----------|---------|---------|---------|--------------|--------------|---------|---------|--------------|---------|----------------------------------------------|-----------|---------|---------|---------|--------------|--------------|---------|---------|--------------|---------|-------------------------------------------|-----------|---------|---------|---------|--------------|--------------|---------|---------|--------------|-------|
|                             |                           | # of symptoms                            | QoL score | GFAP    | NFL     | MCP1    | IFN $\alpha$ | IFN $\gamma$ | IL-6    | IL-10   | TNF $\alpha$ | IP-10   | # of symptoms                                | QoL score | GFAP    | NFL     | MCP1    | IFN $\alpha$ | IFN $\gamma$ | IL-6    | IL-10   | TNF $\alpha$ | IP-10   | # of symptoms                             | QoL score | GFAP    | NFL     | MCP1    | IFN $\alpha$ | IFN $\gamma$ | IL-6    | IL-10   | TNF $\alpha$ | IP-10 |
| Higher in PASC than no-PASC | S-sulfocysteine           | <i>rho</i>                               | 0.3474    | -0.0975 | -0.1653 | -0.1215 | 0.0594       | -0.1517      | -0.1287 | -0.1154 | 0.1906       | 0.0980  | -0.1051                                      | -0.1909   | 0.0320  | 0.3566  | 0.1019  | 0.1053       | 0.0178       | 0.0716  | 0.1245  | 0.3072       | -0.1592 | -0.0975                                   | -0.1992   | 0.0021  | -0.3727 | -0.0862 | 0.0607       | -0.1841      | 0.1556  | 0.0677  |              |       |
|                             |                           | <i>P value</i>                           | 0.0001    | 0.3925  | 0.1377  | 0.2770  | 0.5960       | 0.6048       | 0.8495  | 0.2493  | 0.3020       | 0.0863  | 0.3842                                       | 0.5543    | 0.2579  | 0.8508  | 0.0303  | 0.5724       | 0.5352       | 0.9168  | 0.6737  | 0.4630       | 0.0160  | 0.2963                                    | 0.5240    | 0.1895  | 0.9890  | 0.2589  | 0.5824       | 0.6819       | 0.2262  | 0.3074  | 0.6626       |       |
|                             |                           | <i>n</i>                                 | 116       | 79      | 82      | 82      | 82           | 14           | 76      | 82      | 82           | 82      | 81                                           | 34        | 37      | 37      | 37      | 33           | 37           | 37      | 37      | 37           | 61      | 45                                        | 45        | 45      | 45      | 11      | 43           | 45           | 45      | 45      | 44           |       |
|                             | L-Cystine                 | <i>rho</i>                               | 0.3145    | -0.2378 | -0.0607 | 0.0521  | 0.1829       | -0.3451      | -0.0887 | 0.5489  | 0.1334       | 0.4746  | 0.1469                                       | -0.0484   | -0.0756 | 0.2354  | 0.2909  | -0.0572      | 0.7110       | -0.0121 | 0.4772  | 0.2776       | 0.2431  | -0.0994                                   | -0.0302   | -0.0501 | 0.1943  | -0.4636 | -0.0807      | 0.4224       | 0.2148  | 0.4605  | -0.0065      |       |
|                             |                           | <i>P value</i>                           | 0.0006    | 0.0348  | 0.5882  | 0.6418  | 0.1001       | 0.2269       | 0.4462  | <0.0001 | 0.2320       | <0.0001 | 0.1907                                       | 0.7859    | 0.6564  | 0.1607  | 0.0807  | 0.7521       | <0.0001      | 0.9434  | 0.0028  | 0.0962       | 0.0590  | 0.5161                                    | 0.8440    | 0.7440  | 0.2008  | 0.1509  | 0.6069       | 0.0038       | 0.1566  | 0.0015  | 0.9667       |       |
|                             |                           | <i>n</i>                                 | 116       | 79      | 82      | 82      | 82           | 14           | 76      | 82      | 82           | 82      | 81                                           | 34        | 37      | 37      | 37      | 33           | 37           | 37      | 37      | 37           | 61      | 45                                        | 45        | 45      | 45      | 11      | 43           | 45           | 45      | 45      | 44           |       |
|                             | L-Glutamine               | <i>rho</i>                               | 0.1950    | 0.0173  | 0.1811  | -0.0923 | -0.1799      | 0.1912       | 0.0394  | 0.0245  | 0.1196       | -0.0188 | -0.0792                                      | -0.0069   | 0.1560  | 0.0624  | -0.1313 | -0.2386      | -0.0218      | 0.2385  | -0.0007 | -0.2224      | 0.0521  | 0.1797                                    | 0.2551    | -0.1751 | -0.2115 | -0.0273 | 0.1701       | -0.0229      | 0.0285  | -0.1073 | -0.0795      |       |
|                             |                           | <i>P value</i>                           | 0.0360    | 0.8795  | 0.1035  | 0.4094  | 0.1057       | 0.5126       | 0.7352  | 0.8269  | 0.2845       | 0.8667  | 0.4823                                       | 0.9691    | 0.3565  | 0.7139  | 0.4384  | 0.1811       | 0.8980       | 0.1552  | 0.9967  | 0.1859       | 0.8902  | 0.2375                                    | 0.0908    | 0.2500  | 0.1632  | 0.9366  | 0.2756       | 0.8812       | 0.8528  | 0.4832  | 0.6080       |       |
|                             |                           | <i>n</i>                                 | 116       | 79      | 82      | 82      | 82           | 14           | 76      | 82      | 82           | 82      | 81                                           | 34        | 37      | 37      | 37      | 33           | 37           | 37      | 37      | 37           | 61      | 45                                        | 45        | 45      | 45      | 11      | 43           | 45           | 45      | 45      | 44           |       |
|                             | Quinolinic acid           | <i>rho</i>                               | 0.2091    | -0.2667 | -0.1205 | 0.1882  | 0.2445       | -0.2615      | 0.0439  | 0.4423  | 0.1934       | 0.5146  | 0.2732                                       | 0.0847    | -0.0299 | 0.3092  | 0.3075  | 0.0488       | 0.4829       | 0.0413  | 0.4054  | 0.3376       | 0.0951  | -0.2555                                   | -0.0862   | 0.1748  | 0.2849  | -0.5818 | 0.0745       | 0.3391       | 0.3229  | 0.5725  | 0.1821       |       |
|                             |                           | <i>P value</i>                           | 0.0243    | 0.0175  | 0.2809  | 0.0904  | 0.0268       | 0.3664       | 0.7067  | <0.0001 | 0.0817       | <0.0001 | 0.0136                                       | 0.6341    | 0.8607  | 0.0626  | 0.0641  | 0.7874       | 0.0025       | 0.8085  | 0.0128  | 0.0410       | 0.4662  | 0.0902                                    | 0.5736    | 0.2507  | 0.0579  | 0.0604  | 0.6351       | 0.0227       | 0.0305  | <0.0001 | 0.2368       |       |
|                             |                           | <i>n</i>                                 | 116       | 79      | 82      | 82      | 82           | 14           | 76      | 82      | 82           | 82      | 81                                           | 34        | 37      | 37      | 37      | 33           | 37           | 37      | 37      | 37           | 61      | 45                                        | 45        | 45      | 45      | 11      | 43           | 45           | 45      | 45      | 44           |       |
| Ornithine                   | <i>rho</i>                | 0.1815                                   | 0.0064    | -0.1242 | 0.0941  | 0.1028  | 0.0593       | 0.0809       | -0.0201 | 0.2537  | 0.0267       | 0.0309  | -0.0961                                      | -0.0704   | -0.2184 | 0.2053  | 0.2253  | 0.0773       | -0.1859      | 0.1577  | 0.1055  | 0.0065       | 0.1758  | -0.1294                                   | 0.3322    | 0.0603  | -0.0182 | 0.0360  | -0.1322      | 0.3183       | -0.1170 | -0.0665 |              |       |
|                             | <i>P value</i>            | 0.0512                                   | 0.9557    | 0.2661  | 0.4007  | 0.3582  | 0.8403       | 0.4871       | 0.8579  | 0.0215  | 0.8120       | 0.7839  | 0.5887                                       | 0.6788    | 0.1942  | 0.2228  | 0.2075  | 0.6493       | 0.2707       | 0.3514  | 0.5343  | 0.9604       | 0.2481  | 0.3970                                    | 0.0258    | 0.6938  | 0.9577  | 0.8186  | 0.3869       | 0.0331       | 0.4440  | 0.6679  |              |       |
|                             | <i>n</i>                  | 116                                      | 79        | 82      | 82      | 82      | 14           | 76           | 82      | 82      | 82           | 81      | 34                                           | 37        | 37      | 37      | 33      | 37           | 37           | 37      | 37      | 61           | 45      | 45                                        | 45        | 45      | 11      | 43      | 45           | 45           | 45      | 44      |              |       |
| 2-Phenylphenol              | <i>rho</i>                | 0.1608                                   | 0.0604    | -0.0130 | -0.0589 | -0.0221 | -0.0506      | -0.0198      | 0.0013  | -0.0080 | 0.0000       | -0.0226 | 0.1387                                       | 0.1719    | -0.0505 | 0.0688  | -0.1043 | -0.0213      | 0.1098       | -0.2079 | 0.0775  | -0.0436      | 0.0994  | -0.0730                                   | -0.0999   | -0.0623 | 0.0818  | 0.0527  | -0.0600      | -0.0974      | 0.0307  | -0.1915 |              |       |
|                             | <i>P value</i>            | 0.0847                                   | 0.5969    | 0.9077  | 0.5991  | 0.8436  | 0.8637       | 0.8654       | 0.9909  | 0.9433  | 0.9998       | 0.8472  | 0.4341                                       | 0.3090    | 0.7666  | 0.6860  | 0.5636  | 0.9002       | 0.5178       | 0.2169  | 0.6483  | 0.7387       | 0.5158  | 0.6337                                    | 0.5139    | 0.6842  | 0.8110  | 0.7371  | 0.6957       | 0.5246       | 0.8413  | 0.2129  |              |       |
|                             | <i>n</i>                  | 116                                      | 79        | 82      | 82      | 82      | 14           | 76           | 82      | 82      | 82           | 81      | 34                                           | 37        | 37      | 37      | 33      | 37           | 37           | 37      | 37      | 61           | 45      | 45                                        | 45        | 45      | 11      | 43      | 45           | 45           | 45      | 44      |              |       |
| Lower in PASC than no-PASC  | Sarcosine                 | <i>rho</i>                               | -0.2371   | 0.1424  | 0.2452  | -0.0982 | 0.0741       | 0.0637       | 0.0435  | 0.1671  | 0.2102       | 0.1017  | 0.0972                                       | -0.1135   | 0.1969  | 0.0673  | 0.1726  | 0.0521       | 0.1916       | 0.2504  | 0.0763  | 0.0481       | 0.0073  | -0.0119                                   | 0.2278    | -0.2235 | -0.0038 | 0.1546  | 0.1009       | 0.2335       | 0.1867  | 0.1942  | 0.1550       |       |
|                             |                           | <i>P value</i>                           | 0.0104    | 0.2105  | 0.0264  | 0.3802  | 0.5083       | 0.8286       | 0.7094  | 0.1336  | 0.0581       | 0.3631  | 0.3881                                       | 0.5226    | 0.2379  | 0.6921  | 0.3070  | 0.7732       | 0.2560       | 0.1350  | 0.6534  | 0.7773       | 0.9556  | 0.9383                                    | 0.1323    | 0.1401  | 0.9801  | 0.6500  | 0.5198       | 0.1227       | 0.2195  | 0.2011  | 0.3149       |       |
|                             |                           | <i>n</i>                                 | 116       | 79      | 82      | 82      | 82           | 14           | 76      | 82      | 82           | 82      | 81                                           | 34        | 37      | 37      | 37      | 33           | 37           | 37      | 37      | 37           | 61      | 45                                        | 45        | 45      | 45      | 11      | 43           | 45           | 45      | 45      | 44           |       |
|                             | 1-Methylnicotinamide      | <i>rho</i>                               | -0.1806   | 0.1084  | 0.0638  | -0.0247 | -0.0501      | 0.0725       | 0.0543  | -0.2808 | 0.0299       | -0.2962 | -0.0526                                      | 0.0069    | -0.1131 | -0.0695 | -0.0211 | 0.0371       | 0.4007       | -0.0837 | -0.3400 | -0.1380      | 0.0620  | -0.0389                                   | 0.0490    | -0.0119 | -0.1702 | 0.0091  | 0.0739       | -0.1530      | 0.0735  | -0.2111 | 0.0660       |       |
|                             |                           | <i>P value</i>                           | 0.0524    | 0.3415  | 0.5690  | 0.8255  | 0.6546       | 0.8054       | 0.6414  | 0.0106  | 0.7899       | 0.0069  | 0.6408                                       | 0.9891    | 0.5051  | 0.6829  | 0.9014  | 0.8376       | 0.0140       | 0.6224  | 0.0395  | 0.4154       | 0.6350  | 0.7998                                    | 0.7492    | 0.9384  | 0.2636  | 0.9788  | 0.6379       | 0.3158       | 0.6313  | 0.1640  | 0.6705       |       |
|                             |                           | <i>n</i>                                 | 116       | 79      | 82      | 82      | 82           | 14           | 76      | 82      | 82           | 82      | 81                                           | 34        | 37      | 37      | 37      | 33           | 37           | 37      | 37      | 37           | 61      | 45                                        | 45        | 45      | 45      | 11      | 43           | 45           | 45      | 45      | 44           |       |
|                             | 3,5-Dihydroxybenzoic acid | <i>rho</i>                               | -0.2099   | 0.1481  | 0.0416  | 0.2838  | 0.2055       | 0.1121       | -0.0101 | -0.0774 | -0.0548      | -0.0526 | -0.0222                                      | 0.0669    | 0.1155  | 0.2814  | 0.1679  | -0.0849      | -0.0059      | -0.0197 | 0.0766  | 0.1375       | -0.1318 | -0.0185                                   | -0.0386   | 0.2648  | 0.1444  | -0.1273 | 0.0337       | -0.1228      | -0.0842 | -0.0949 | -0.1834      |       |
|                             |                           | <i>P value</i>                           | 0.0237    | 0.1927  | 0.7108  | 0.0098  | 0.0640       | 0.7028       | 0.9311  | 0.4895  | 0.6249       | 0.6390  | 0.8439                                       | 0.7070    | 0.4962  | 0.0915  | 0.3207  | 0.6386       | 0.9722       | 0.9080  | 0.6524  | 0.4170       | 0.3113  | 0.9038                                    | 0.8012    | 0.0787  | 0.3440  | 0.7092  | 0.8302       | 0.4216       | 0.5824  | 0.5354  | 0.2335       |       |
|                             |                           | <i>n</i>                                 | 116       | 79      | 82      | 82      | 82           | 14           | 76      | 82      | 82           | 82      | 81                                           | 34        | 37      | 37      | 37      | 33           | 37           | 37      | 37      | 37           | 61      | 45                                        | 45        | 45      | 45      | 11      | 43           | 45           | 45      | 45      | 44           |       |
|                             | Indole-3-lactic acid      | <i>rho</i>                               | -0.2076   | 0.0977  | 0.0622  | 0.0232  | -0.0166      | 0.4066       | -0.0724 | 0.0259  | -0.0029      | -0.2940 | -0.1782                                      | 0.3240    | 0.0974  | -0.2909 | -0.0194 | -0.1544      | -0.2764      | 0.0026  | -0.4524 | -0.2755      | -0.1110 | -0.1940                                   | 0.0003    | 0.2206  | -0.0258 | 0.4364  | -0.0253      | -0.2294      | 0.0258  | -0.1622 | -0.1015      |       |
|                             |                           | <i>P value</i>                           | 0.0253    | 0.3915  | 0.5789  | 0.8360  | 0.8822       | 0.1491       | 0.5343  | 0.0259  | 0.9795       | 0.0073  | 0.1115                                       | 0.0616    | 0.5662  | 0.0807  | 0.9091  | 0.3909       | 0.0977       | 0.9878  | 0.0049  | 0.0989       | 0.3943  | 0.2017                                    | 0.9986    | 0.1454  | 0.8663  | 0.1797  | 0.8721       | 0.1296       | 0.8663  | 0.2871  | 0.5122       |       |
|                             |                           | <i>n</i>                                 | 116       | 79      | 82      | 82      | 82           | 14           | 76      | 82      | 82           | 82      | 81                                           | 34        | 37      | 37      | 37      | 33           | 37           | 37      | 37      | 37           | 61      | 45                                        | 45        | 45      | 45      | 11      | 43           | 45           | 45      | 45      | 44           |       |
| L-Methionine                | <i>rho</i>                | -0.1406                                  | 0.1086    | 0.1052  | -0.0750 | 0.0688  | -0.3451      | 0.0985       | 0.1044  | 0.1520  | 0.0682       | 0.1501  | -0.0302                                      | -0.0832   | 0.2141  | 0.2350  | 0.0050  | 0.3755       | 0.1183       | 0.3523  | 0.4028  | 0.1284       | 0.0320  | 0.2609                                    | -0.3156   | -0.1560 | -0.2546 | 0.1821  | 0.0460       | 0.1947       | -0.0531 | 0.0312  |              |       |
|                             | <i>P value</i>            | 0.1322                                   | 0.3410    | 0.3467  | 0.5028  | 0.5391  | 0.2269       | 0.3973       | 0.3508  | 0.1727  | 0.5426       | 0.1811  | 0.8656                                       | 0.6244    | 0.2033  | 0.1616  | 0.9779  | 0.0220       | 0.4856       | 0.0325  | 0.0134  | 0.3243       | 0.8347  | 0.0835                                    | 0.0347    | 0.3062  | 0.4500  | 0.2424  | 0.7642       | 0.1999       | 0.7290  | 0.8409  |              |       |
|                             | <i>n</i>                  | 116                                      | 79        | 82      | 82      | 82      | 14           | 76           | 82      | 82      | 82           | 81      | 34                                           | 37        | 37      | 37      | 33      | 37           | 37           | 37      | 37      | 61           | 45      | 45                                        | 45        | 45      | 11      | 43      | 45           | 45           | 45      | 44      |              |       |
| Pipelicolic acid            | <i>rho</i>                | -0.1812                                  | 0.0697    | 0.0161  | -0.2210 | -0.0622 | 0.2352       | -0.0250      | -0.2557 | 0.0239  | -0.2046      | 0.0811  | 0.0501                                       | -0.1057   | -0.1114 | -0.1724 | -0.0147 | -0.2598      | -0.0311      | -0.2482 | 0.0804  | -0.0095      | -0.1221 | 0.0755                                    | -0.2920   | -0.1183 | 0.4091  | -0.0486 | -0.2242      | 0.0066       | -0.1571 | 0.0599  |              |       |
|                             | <i>P value</i>            | 0.0516                                   | 0.5418    | 0.8860  | 0.0460  | 0.5788  | 0.4183       | 0.8300       | 0.0204  | 0.8316  | 0.0652       | 0.4719  | 0.7784                                       | 0.5334    | 0.5115  | 0.3077  | 0.9353  | 0.1204       | 0.8552       | 0.1385  | 0.6363  | 0.9423       | 0.4243  | 0.6221                                    | 0.0516    | 0.4389  | 0.2115  | 0.7572  | 0.1386       | 0.9657       | 0.3029  | 0.6993  |              |       |
|                             | <i>n</i>                  | 116                                      | 79        | 82      | 82      | 82      | 14           | 76           | 82      | 82      | 82           | 81      | 34                                           | 37        | 37      | 37      | 33      | 37           | 37           | 37      | 37      | 61           | 45      | 45                                        | 45        | 45      | 11      | 43      | 45           | 45           | 45      | 44      |              |       |

Red = significant positive correlation  
Blue = significant negative correlation
